# Supplementary material
Source: Research Square preprint supplement (doi:10.21203/rs.3.rs-9763700/v1)
Supplement: Supplementary file 1 [file 2583ea0488190c5c568f5317.docx]

**From Construction Burden to Operational Benefits: A Life Cycle Analysis of Sponge City Source Control Facilities**

Changqing Xu*a,b*,1, Yuewen Luob,1, Tianyu Jiab*, Hua Chai c,d*, Haifeng Jiae,*

*a Beijing Key Laboratory of Urban Hydrological Cycle and Sponge City Technology, Beijing 100875, China*

*b School of Economics, Beijing Institute of Technology, Beijing 100081, China*

*c State Key Laboratory of Urban and Regional Ecology, Research Center for Eco-Environmental Sciences, Chinese Academy of Sciences, Beijing, 100085, China.*

*d University of the Chinese Academy of Sciences, Beijing, 100049, China*

*e School of Environment, Tsinghua University, Beijing 100084, China*

*1 These authors contributed equally.*

* Corresponding author: 3120246164@bit.edu.cn; [chaihua23@mails.ucas.ac.cn](mailto:chaihua23@mails.ucas.ac.cntsinghua.edu.cn); [jhf@tsinghua.edu.cn](mailto:jhf@tsinghua.edu.cn)

The supporting information contains 6 pages, 4 tables.

**Supplementary information**

**Tab. S1 The values from U1 to U6**

|  |  | 1 | 2 | 3 | 4 | 5 |
| --- | --- | --- | --- | --- | --- | --- |
| U1 | Reliability | 1.00 | 1.05 | 1.10 | 1.20 | 1.50 |
| U2 | Completeness | 1.00 | 1.02 | 1.05 | 1.10 | 1.20 |
| U3 | Temporal correlation | 1.00 | 1.03 | 1.10 | 1.20 | 1.50 |
| U4 | Geographical correlation | 1.00 | 1.01 | 1.02 | 1.05 | 1.10 |
| U5 | Further technological correlation | 1.00 | 1.10 | 1.20 | 1.50 | 2.00 |
| U6 | Sample size | 1.00 | 1.02 | 1.05 | 1.10 | 1.20 |

**Tab. S2 Monte Carlo simulation Ub value table**

|  | Input/Output group | a | p | a |
| --- | --- | --- | --- | --- |
| Demand of | thermal energy, electricity, semi-finished products, working materials, waste treatment services | 1.05 | 1.05 | 1.05 |
| transport services (tkm) | 2.00 | 2.00 | 2.00 |
| infrastructure | 3.00 | 3.00 | 3.00 |
| Resources | primary energy carriers, metals, salts | 1.05 | 1.05 | 1.05 |
| land use, occupation | 1.50 | 1.50 | 1.50 |
| land use, transformation | 2.00 | 2.00 | 2.00 |
| Pollutants emitted to water | BOD, COD, DOC, TOC, inorganic compounds (NH4, PO4, NO3, Cl, Na, etc.) |  | 1.50 |  |
| individual hydrocarbons, PAH |  | 3.00 |  |
| heavy metals |  | 5.00 | 1.80 |
| pesticides |  |  | 1.50 |
| NO3, PO4 |  |  | 1.50 |
| Pollutants emitted to soil | oil, hydrocarbon total |  | 1.50 |  |
| heavy metals |  | 1.50 | 1.50 |
| pesticides |  |  | 1.20 |
| Pollutants emitted to air | CO2 | 1.05 | 1.05 |  |
| SO2 | 1.05 |  |  |
| NMVOC total | 1.50 |  |  |
| Nox, N2O | 1.50 |  | 1.40 |
| CH4,NH3 | 1.50 |  | 1.20 |
| individual hydrocarbons | 1.50 | 2.00 |  |
| PM>10 | 1.50 | 1.50 |  |
| PM10 | 2.00 | 2.00 |  |
| PM2.5 | 3.00 | 3.00 |  |
| polycyclic aromatic hydrocarbon(PAH) | 3.00 |  |  |
| CO, heavy metals | 5.00 |  |  |
| inorganic emissions, others |  | 1.50 |  |
| radionuclides (eg. Radon-222) |  | 3.00 |  |

**Tab. S3 LCIA characterization results for SCSCFs and the contribution of main process to in the Recipe mid-point scores during construction phase**

| **Categories** | **Unit** | | **Grassed swales** | | | **Bioretention cells** | | | | **Infiltration pits** | | | | **Buffer strips** | | | |
| --- | --- | --- | --- | --- | --- | --- | --- | --- | --- | --- | --- | --- | --- | --- | --- | --- | --- |
| **Value** | | **Process** | **Value** | | | **Process** | **Value** | | | **Process** | **Value** | | | **Process** |
| Global warming | | kg CO2 eq | | 2.05×103 | Concrete (51%)  +Transportation (41%) | | 4.17×103 | Non-woven fabrics（50%）  +PVC（25%）  +Transportation（25%） | | | 1.40×104 | PVC(40%)  +Concrete (55%) | | | 1.37×103 | PVC(40%)  +Concrete(55%) | |
| Stratospheric ozone depletion | | kg CFC11 eq | | 0.00 | Non-woven fabrics (49%)  +Transportation (33%) | | 0.02 | Non-woven fabrics（92%） | | | 0.01 | PVC(34%)  +Non-woven fabrics（37%）  +Concrete (29%) | | | 0.00 | PVC(85%) | |
| Ionizing radiation | | kBq Co-60 eq | | 31.40 | Concrete (27%)  +Transportation (48%) | | 1.57×102 | Non-woven fabrics（52%）  +PVC（36%） | | | 4.65×102 | PVC(64%)  +Concrete (30%) | | | 59.91 | PVC(94%) | |
| Ozone formation, Human health | | kg NOx eq | | 7.60 | Concrete (44%)  +Transportation (50%) | | 14.01 | Non-woven fabrics（49%）  +Transportation（33%） | | | 50.03 | PVC(25%)  +Concrete (70%) | | | 3.47 | PVC(69%)  +Concrete(23%) | |
| Fine particulate matter formation | | kg PM2.5 eq | | 2.95 | Concrete(54%)  +Transportation (35%) | | 7.72 | Non-woven fabrics（63%）  +PVC（20%） | | | 19.48 | PVC(42%)  +Concrete (50%) | | | 2.03 | PVC(77%)  +Concrete(19%) | |
| Ozone formation, Terrestrial ecosystems | | kg NOx eq | | 7.71 | Concrete(44%)  +Transportation (50%) | | 14.26 | Non-woven fabrics（49%）  +Transportation（33%） | | | 51.18 | PVC(26%)  +Concrete (70%) | | | 3.57 | PVC(70%)  +Concrete(23%) | |
| Terrestrial acidification | | kg SO2 eq | | 8.39 | Concrete(58%)  +Transportation (30%) | | 25.40 | Non-woven fabrics（75%） | | | 46.82 | PVC(38%)  +Concrete (49%) | | | 4.80 | PVC(70%)  +Concrete(25%) | |
| Freshwater eutrophication | | kg P eq | | 0.47 | Concrete(42%)  +Transportation (35%) | | 2.62 | Non-woven fabrics（78%） | | | 4.10 | PVC(46%)  +Concrete (38%) | | | 0.43 | PVC(84%) | |
| Marine eutrophication | | kg N eq | | 0.49 | Non-woven fabrics(96%) | | 12.17 | Non-woven fabrics（100%） | | | 4.06 | Non-woven fabrics（93%） | | | 0.11 | PVC(38%)  +Non-woven fabrics（60%） | |
| Terrestrial ecotoxicity | | kg 1,4-DCB | | 1.76×104 | Transportation (83%) | | 2.90×104 | Transportation（62%）  +Non-woven fabrics（20%） | | | 1.65×105 | Concrete (83%) | | | 6.50×103 | PVC(78%） | |
| Freshwater ecotoxicity | | kg 1,4-DCB | | 44.62 | Concrete(40%)  +Transportation (37%) | | 2.33×102 | Non-woven fabrics（70%）  +PVC（20%） | | | 4.72×102 | PVC(57%)  +Concrete (32%) | | | 57.02 | PVC(89%) | |
| Marine ecotoxicity | | kg 1,4-DCB | | 64.98 | Concrete(37%)  +Transportation (46%) | | 2.50×102 | Non-woven fabrics（59%）  +PVC（27%） | | | 6.77×102 | PVC(52%)  +Concrete (41%) | | | 75.62 | PVC(89%) | |
| Human carcinogenic toxicity | | kg 1,4-DCB | | 70.05 | Concrete(40%)  +Transportation (48%) | | 1.85×102 | Non-woven fabrics（45%）  +PVC（33%）  +Transportation（23%） | | | 6.60×102 | PVC(48%)  +Concrete (48%) | | | 69.65 | PVC(87%) | |
| Human non-carcinogenic toxicity | | kg 1,4-DCB | | 1.19×103 | Concrete(35%)  +Transportation (48%) | | 4.59×103 | Non-woven fabrics（62%）  +PVC（22%） | | | 1.17×104 | PVC(46%)  +Concrete (46%) | | | 1.18×103 | PVC(87%) | |
| Land use | | m2a crop eq | | 1.42×102 | Non-woven fabrics（45%）  +Concrete(23%)  +Transportation (31%) | | 1.73×104 | Non-woven fabrics（96%） | | | 1.03×103 | Non-woven fabrics(50%)  +Concrete (39%) | | | 40.50 | PVC(52%)  +Non-woven fabrics(22%)  +Concrete（20%） | |
| Mineral resource scarcity | | kg Cu eq | | 5.96 | Concrete(63%)  +Transportation (28%) | | 11.47 | Non-woven fabrics（49%）  +PVC（33%） | | | 37.46 | PVC(54%)  +Concrete (42%) | | | 4.85 | PVC(79%)  +Concrete(19%) | |
| Fossil resource scarcity | | kg oil eq | | 4.89×102 | Concrete(30%)  +Transportation (58%) | | 1.28×103 | Non-woven fabrics（33%）  +PVC（39%）  +Transportation（28%） | | | 5.41×103 | PVC(48%)  +Concrete (49%) | | | 5.51×102 | PVC(90%) | |
| Water consumption | | m3 | | 67.81 | Non-woven fabrics（72%）  +Concrete(25%) | | 1.27×103 | Non-woven fabrics（99%） | | | 4.80×102 | Non-woven fabrics（82%） | | | 25.22 | PVC(57%)  +Non-woven fabrics(27%)  +Concrete（16%） | |

**Tab. S4 Four SCSCFs cost estimates**

**(a) Construction cost estimates**

| Construction facilities | | Construction engineering cost | Installation engineering cost | Other construction costs | Basic reserve fund |
| --- | --- | --- | --- | --- | --- |
| Grassed swales | Index base price | 1.72×104 | / | / | / |
| Bioretention cells | Index base price | 3.56×104 | 1.87×103 | / | / |
| Infiltration pits | Index base price | 3.32×104 | 3.32×102 | / | / |
| Buffer strips | Index base price | 5.12×104 | / | 3.46×103 | 2.40×103 |

**(b) O&M cost estimates**

| Construction facilities | Water consumption | Water price | Fertilizer application amount | Organic fertilizer price | Maintenance personnel | Labor cost |
| --- | --- | --- | --- | --- | --- | --- |
| Grassed swales | 2.71×103 | 5 | 3.87×103 | 0.5 | 1 | 150 |
| Bioretention cells | 1.43×103 | 5 | 7.82×102 | 0.5 | 1 | 150 |
| Infiltration pits | 4.35×103 | 5 | 1.55×103 | 0.5 | 2 | 150 |
| Buffer strips | 2.50×103 | 5 | 2.38×102 | 0.5 | 1 | 150 |

**(c) Disposal cost estimates**

| Construction facilities | Excavation cost | Transportation cost (30km) |
| --- | --- | --- |
| Grassed swales | 9.28×103 | 7.43×103 |
| Bioretention cells | 4.89×103 | 3.91×103 |
| Infiltration pits | 2.65×103 | 2.12×103 |
| Buffer strips | 7.33×103 | 5.86×103 |
