# Supplementary material
Source: Research Square preprint supplement (doi:10.21203/rs.3.rs-9763700/v1)
Supplement: Supplementary file 2 [file 2f5177ae1ba827daeb07df2b.docx]

**Highlights**

- Conducted LCA-LCC assessment of four typical sponge city source control facilities.
- Construction phase has higher environmental impacts than operation and disposal.
- Grassed swale and buffer strip exhibit the lowest environment impacts.
- Sensitivity and uncertainty analyses identify PVC and fabrics as key drivers.
- Bioretention cells identified as the most cost-effective option for long-term use.
